# Supplementary material
Source: PubMed Central journal article supplement (PMC3847573)
Supplement: cr2013143x4.pdf [file cr2013143x4.pdf]

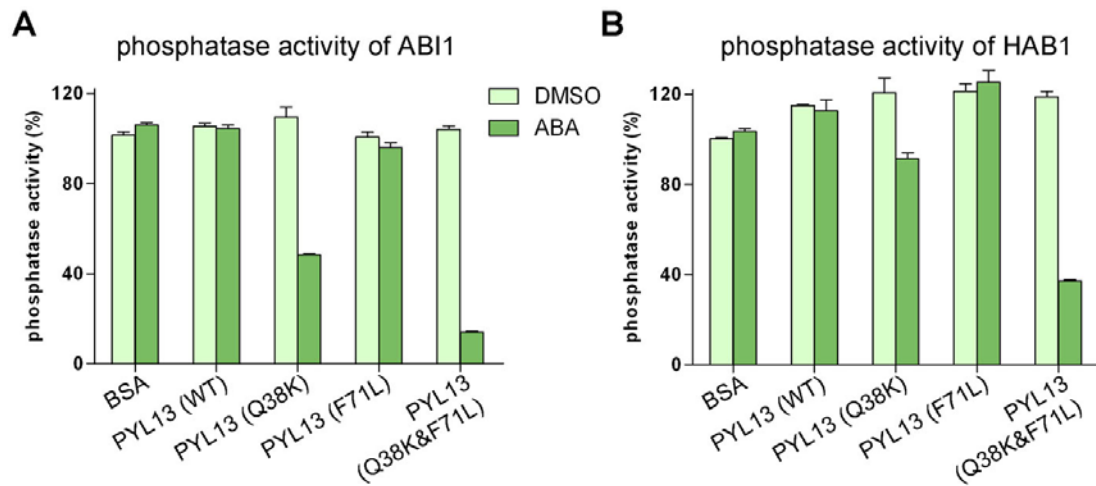

**Supplementary information Figure S4** Structure-guided point mutations converted PYL13 into an ABA receptor. The inhibitory effect of PYL13 variants on ABI1 (**A**) and HAB1 (**B**) were examined.
