# Supplementary material
Source: PubMed Central journal article supplement (PMC3847573)
Supplement: cr2013143x5.pdf [file cr2013143x5.pdf]

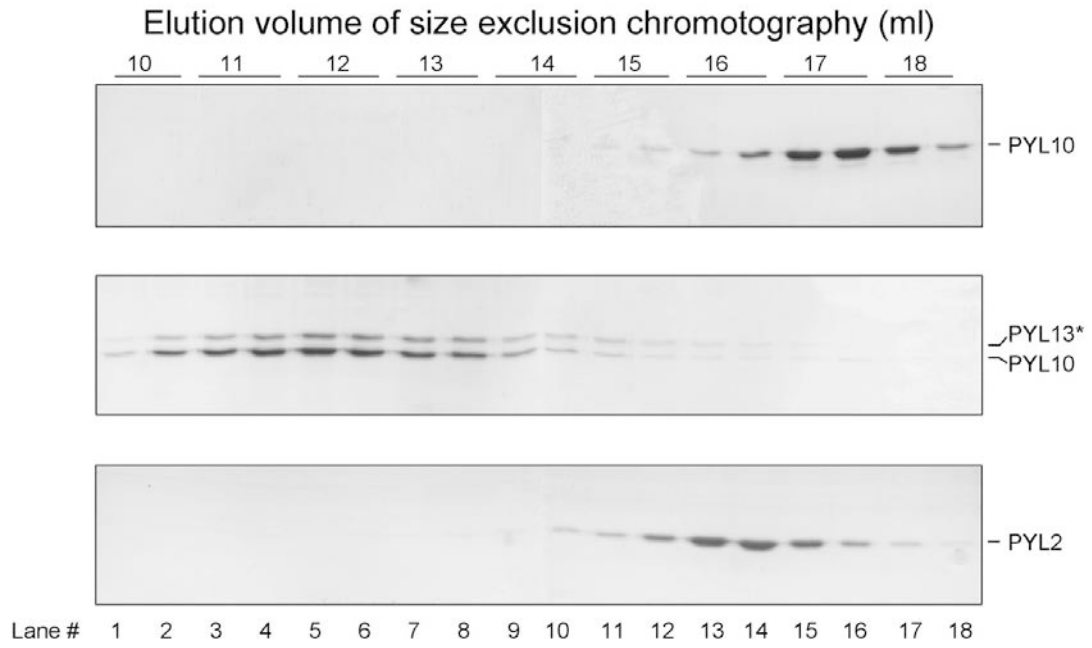

**Supplementary information Figure S5** PYL13 and PYL10 form hetero-complex.  
Size exclusion chromatography analysis of PYL10 (monomer), PYL2 (dimer), as well as the complex between PYL10 and a chimeric PYL13 (PYL13\*).
