# Supplementary material
Source: PubMed Central journal article supplement (PMC3847573)
Supplement: cr2013143x6.pdf [file cr2013143x6.pdf]

## Supplementary information Table S1 Statistics of data collection and refinement

| Data                                      | PYL13-PP2CA           |
|-------------------------------------------|-----------------------|
| Integration Package                       | HKL2000               |
| Space Group                               | P3                    |
| Unit Cell (Å)                             | 111.38, 111.38, 70.41 |
| Unit Cell (°)                             | 90, 90, 120           |
| Wavelength (Å)                            | 1.0000                |
| Resolution (Å)                            | 40~2.38 (2.47~2.38)   |
| R <sub>merge</sub> (%)                    | 6.4 (37.5)            |
| I/sigma                                   | 23.1 (4.3)            |
| Completeness (%)                          | 99.9 (100.0)          |
| Number of measured reflections            | 138,559               |
| Number of unique reflections              | 38,995                |
| Redundancy                                | 3.6 (3.5)             |
| Wilson B factor (Å <sup>2</sup> )         | 46.3                  |
| <hr/>                                     |                       |
| R <sub>work</sub> / R <sub>free</sub> (%) | 21.00/24.45           |
| No. atoms                                 |                       |
| Overall                                   | 6670                  |
| Protein                                   | 6351                  |
| Ion                                       | 12                    |
| Water                                     | 307                   |
| Other entities                            | 0                     |
| Average B value (Å <sup>2</sup> )         |                       |
| Overall                                   | 40.68                 |
| Protein                                   | 40.445                |
| Ion                                       | 41.12                 |
| Water                                     | 45.61                 |
| Other entities                            | 0                     |
| R.m.s. deviations                         |                       |
| Bonds (Å)                                 | 0.009                 |
| Angle (°)                                 | 1.257                 |
| Ramachandran plot statistics (%)          |                       |
| Most favourable                           | 89.5                  |
| Additionally allowed                      | 10.2                  |
| Generously allowed                        | 0.0                   |
| Disallowed                                | 0.3                   |

Values in parentheses are for the highest resolution shell.  $R_{merge} = \frac{\sum_h \sum_i |I_{h,i} - I_h|}{\sum_h \sum_i I_{h,i}}$ , where  $I_h$  is the mean intensity of the  $i$  observations of symmetry related reflections of  $h$ .  $R = \frac{\sum |F_{obs} - F_{calc}|}{\sum F_{obs}}$ , where  $F_{calc}$  is the calculated protein structure factor from the atomic model (R<sub>free</sub> was calculated with 5% of the reflections selected).
