# Supplementary material
Source: PubMed Central journal article supplement (PMC3847573)
Supplement: cr2013143x7.pdf [file cr2013143x7.pdf]

**Supplementary information Table S2** ICP-AES (Inductively Coupled Plasma-Atomic Emission Spectrometry) analysis of the metal contents in PP2CA-PYL13 complex and PYL5

|           | <b>Concentration (<math>\mu\text{M}</math>)</b> |             |
|-----------|-------------------------------------------------|-------------|
|           | <b>PP2CA-PYL13</b>                              | <b>PYL5</b> |
| Protein   | 84                                              | 69          |
| Zinc      | 39                                              | <0.07       |
| Magnesium | 29                                              | 0.25        |
| Manganese | 0.2                                             | <0.009      |
